# Supplementary material for: Methylation of ribosomal RNA by NSUN5 is a conserved mechanism modulating organismal lifespan
Source: PubMed Central journal article supplement (PMC4317494; doi:10.1038/ncomms7158), 2015-01-30
Supplement: ncomms7158-s1.pdf [file ncomms7158-s1.pdf]

**a**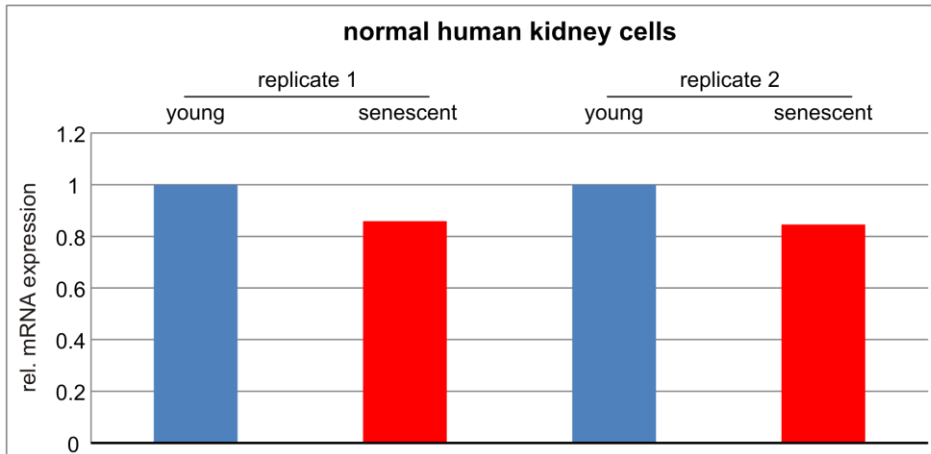**b**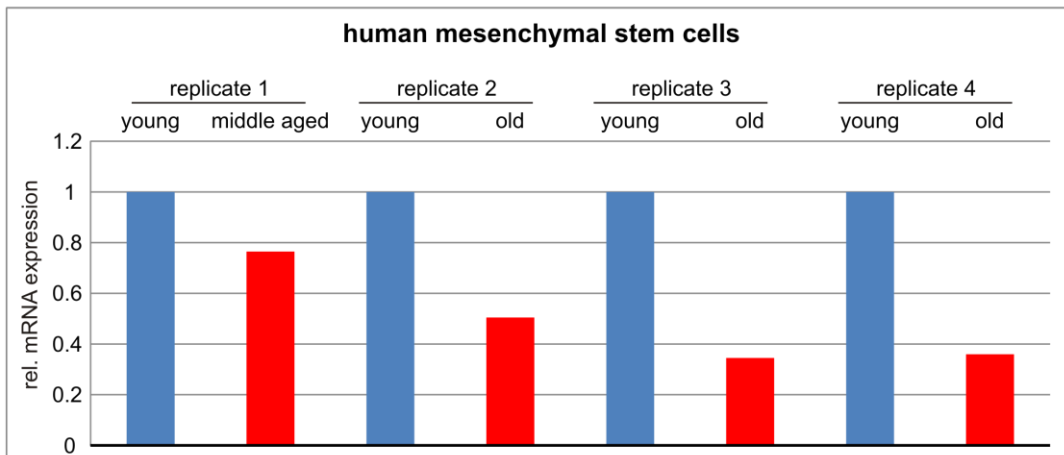**c**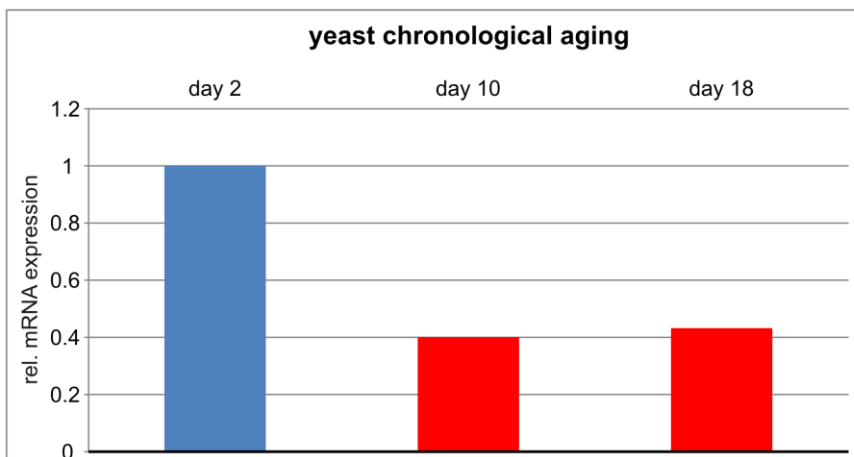

**Supplementary Figure 1 | NSUN5/RCM1 mRNA is less abundant in aged cells.** Gisao.db database derived mRNA expression values of young and replicative-senescent normal human kidney cells from two different donors (**a**), of mesenchymal stem cells from young, middle-aged and old donors (**b**) and of chronologically aged yeast (**c**). For human cells (**a,b**) the mean expression of two probesets is shown. For yeast (**c**), only one probeset for *RCM1* was available.

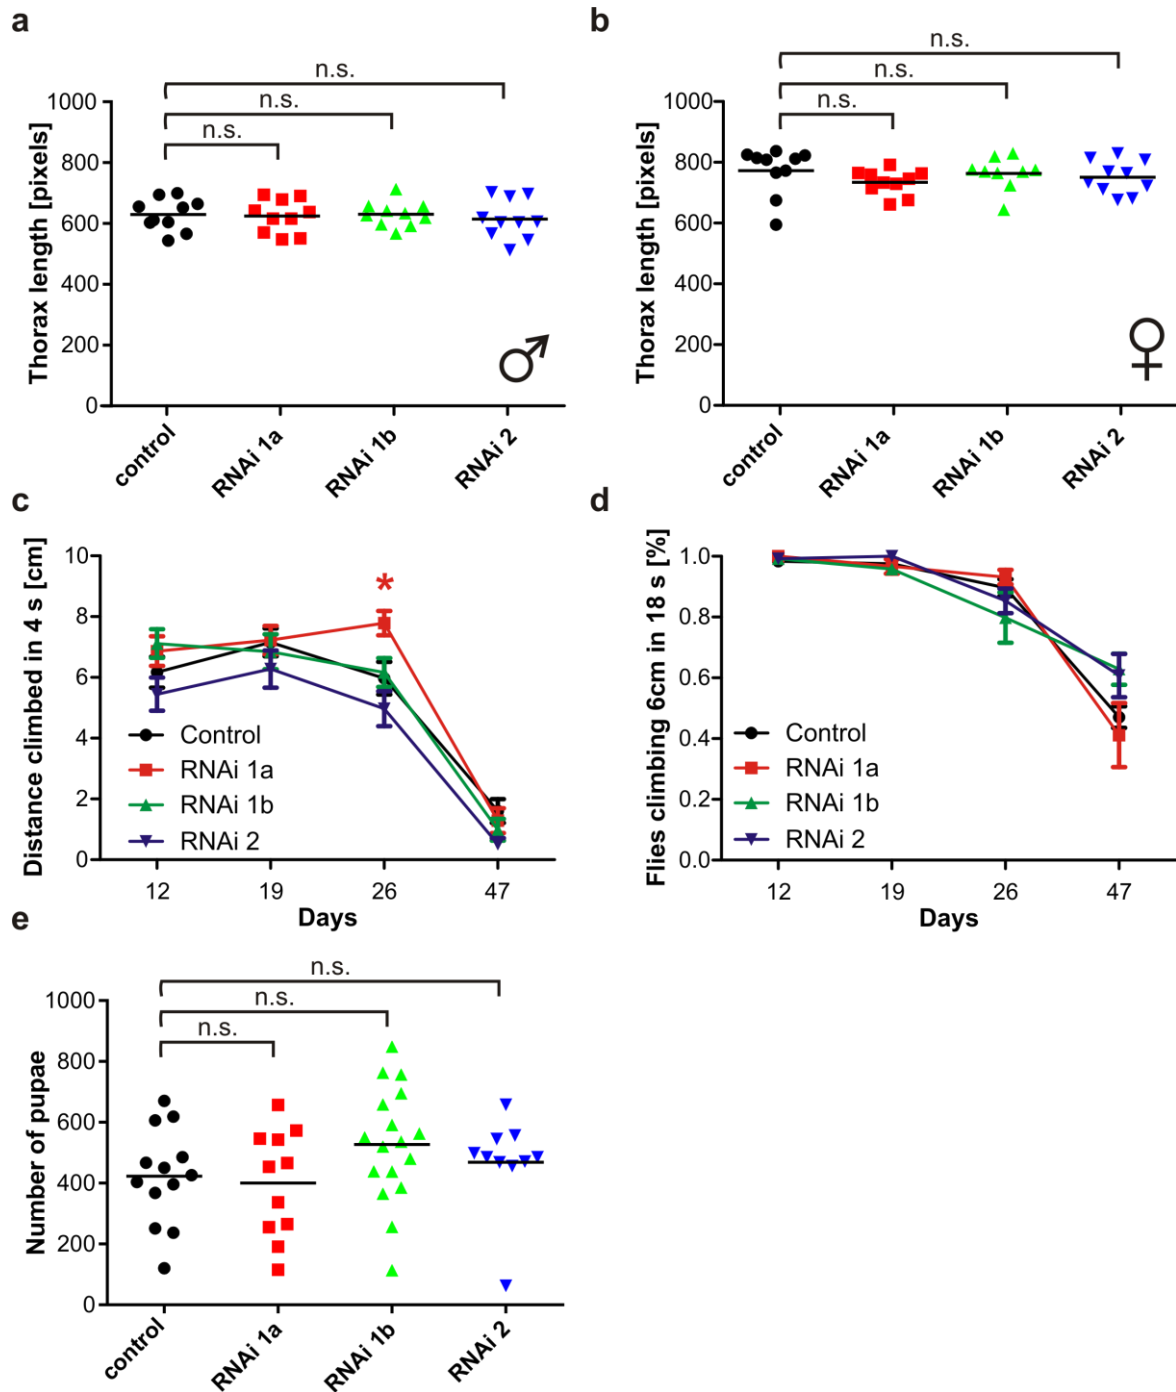

**Supplementary Figure 2 | Phenotypic characterization of *dNsun5* knockdown flies. a-b,** Mean thorax length in pixels of male (**a**) and female (**b**) control and three different *dNsun5* RNAi fly lines. Error bars represent S.E.M. N = 10,  $\alpha = 0.05$ , One-way ANOVA with Dunnett's post test not significant for all conditions. **d-e,** Locomotion of control and three different *dNsun5* RNAi fly lines at different ages measured by climbed distance in 4 s per fly, N = 40 (**c**) or number of flies climbing 6 cm in 18 s, N = 4 (**d**). Two-way ANOVA with Bonferroni post tests at  $\alpha = 0.05$  was not significant unless marked otherwise, \* $p < 0.05$ . **e,** Number of pupae produced over 4 weeks by control and three different *dNsun5* RNAi fly lines. Error bars represent S.E.M. N = 20,  $\alpha = 0.05$ , one-way ANOVA with Dunnett's post test not significant.

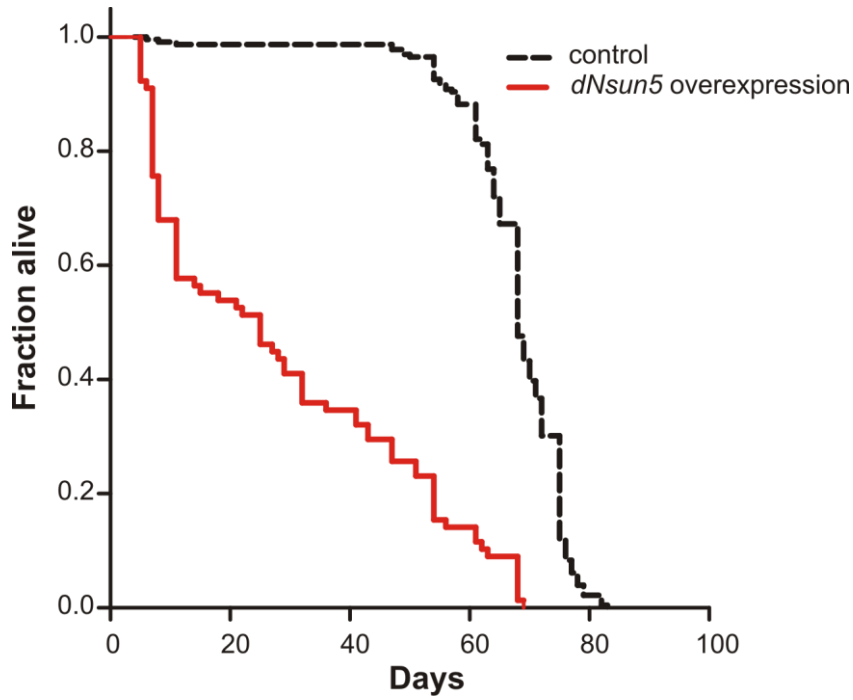

**Supplementary Figure 3 | Overexpression of *dNsun5* shortens *Drosophila* lifespan.** Kaplan-Meier survival curves of control and *dNsun5* overexpressing male *D. melanogaster* (average N per group = 78, log-rank  $p < 0.001$ ).

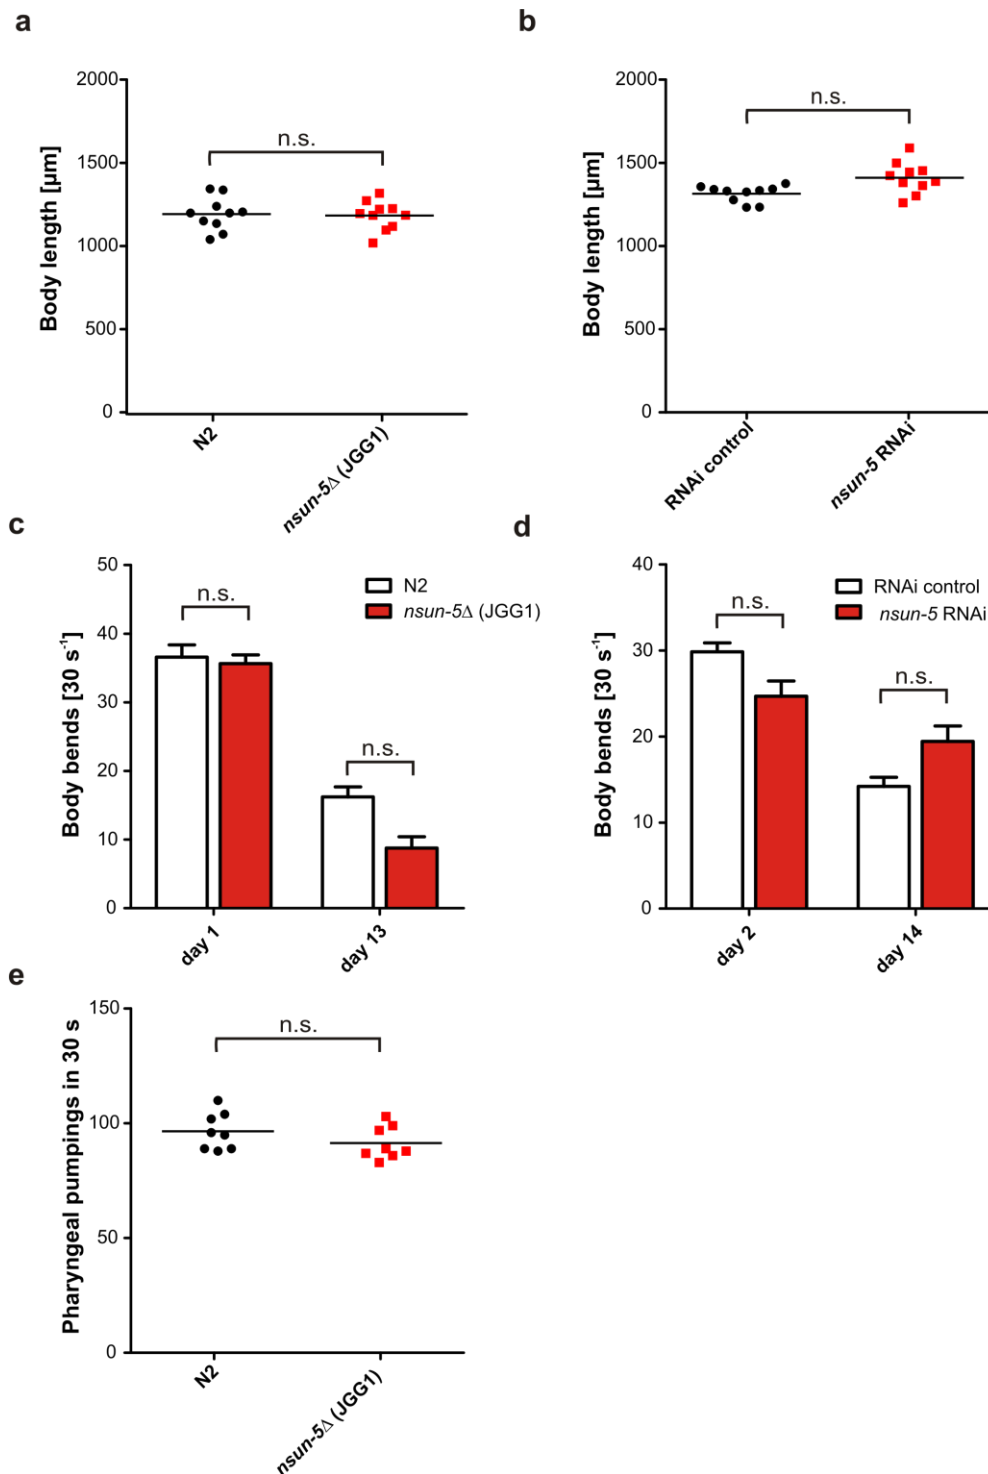

**Supplementary Figure 4 | Phenotypic characterization of *nsun-5* knockout worms. a-b,** Mean body length in  $\mu\text{m}$  of N2 vs. *nsun-5* knockouts (JGG1) (a) or NL2099 subjected to control or *nsun-5* RNAi (b) hermaphrodites. Error bars represent S.E.M.  $N = 10$ ,  $\alpha = 0.05$ , two-sided Student's t-Test not significant. **c-d,** Locomotion activity at different timepoints of wild-type vs. *nsun-5* knockouts (JGG1) (c) or NL2099 subjected to control or *nsun-5* RNAi (d) hermaphrodites. Error bars represent S.E.M.  $N = 20$ ,  $\alpha = 0.05$ , two-sided Student's t-Test at different timepoints not significant. **e,** Pharyngeal pumping of wild-type vs. *nsun-5* knockout (JGG1) hermaphrodites. Error bars represent S.E.M.  $N = 20$ ,  $\alpha = 0.05$ , two-sided Student's t-Test not significant.

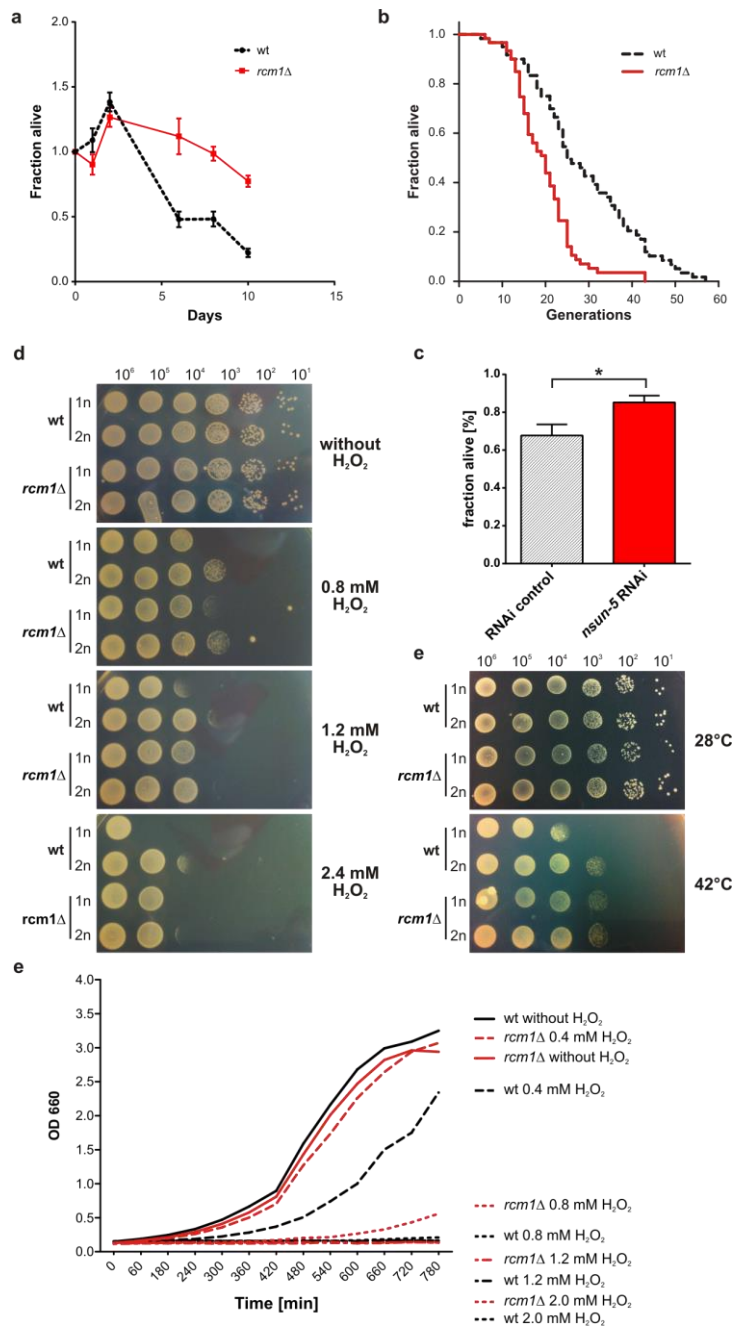

**Supplementary Figure 5 | NSUN5 modulates stress resistance and chronological lifespan.** **a**, Deletion of *rcm1* in haploid *S. cerevisiae* increases chronological lifespan in water. Error bars represent S.E.M. of 2-3 biological replicates. **b**, Replicative lifespan assay of haploid wild-type *S. cerevisiae* vs. a haploid *rcm1* knockout strain (N = 60, log-rank,  $p < 0.001$ ). **c**, RNAi against *nsun-5* increases the paraquat resistance of N2 wild-type worms. Survival after 3 days of treatment with 20 mM paraquat are shown. N = 4 biological replicates with 30 worms each,  $\alpha = 0.05$ , two-tailed t-test \* $p < 0.05$ . Error bars represent S.E.M. **d, e**, Yeast serial dilution growth assays demonstrate increased resistance of haploid (1n) *rcm1Δ* cells compared to the haploid wild-type to H<sub>2</sub>O<sub>2</sub> (**d**) and to heatshock (**e**). Diploid (2n) heterozygously deleted *rcm1* cells compared to the diploid wild-type did not show increased survival, suggesting that a single copy of *RCM1* is sufficient. **f**, Liquid growth assay with increasing amounts of H<sub>2</sub>O<sub>2</sub> in the medium shows increased survival of haploid *rcm1Δ* cells (red) compared to the wild-type (black).

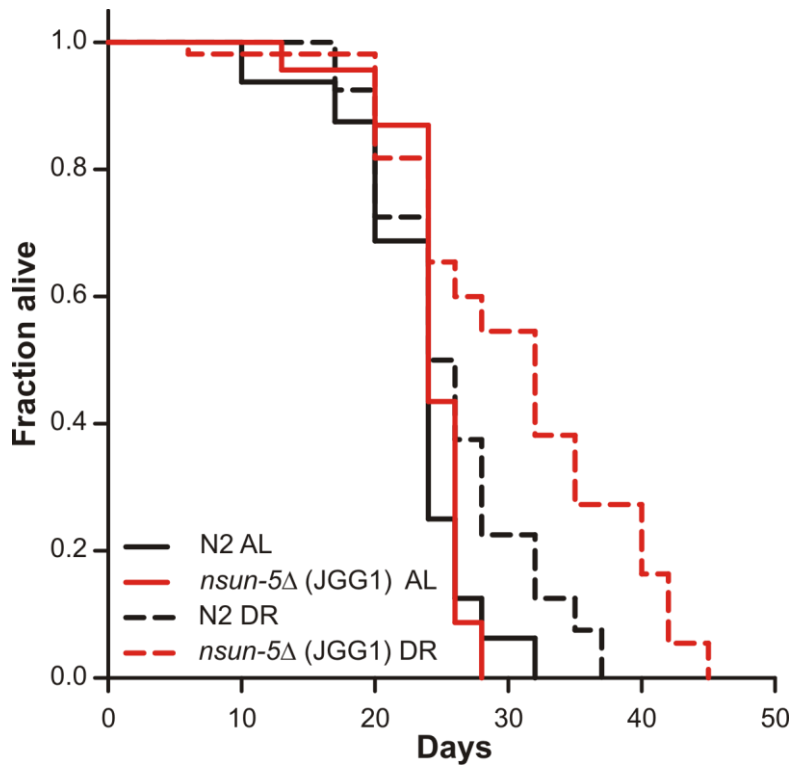

**Supplementary Figure 6 | Lifespans of *nsun-5* mutants are only extended upon complete removal of food.** Dietary restriction (DR) induced by complete removal of food during adulthood extends the lifespan of an *nsun-5* deletion mutant JGG1 (average N per group = 73, log-rank  $p = 0.03$ ).

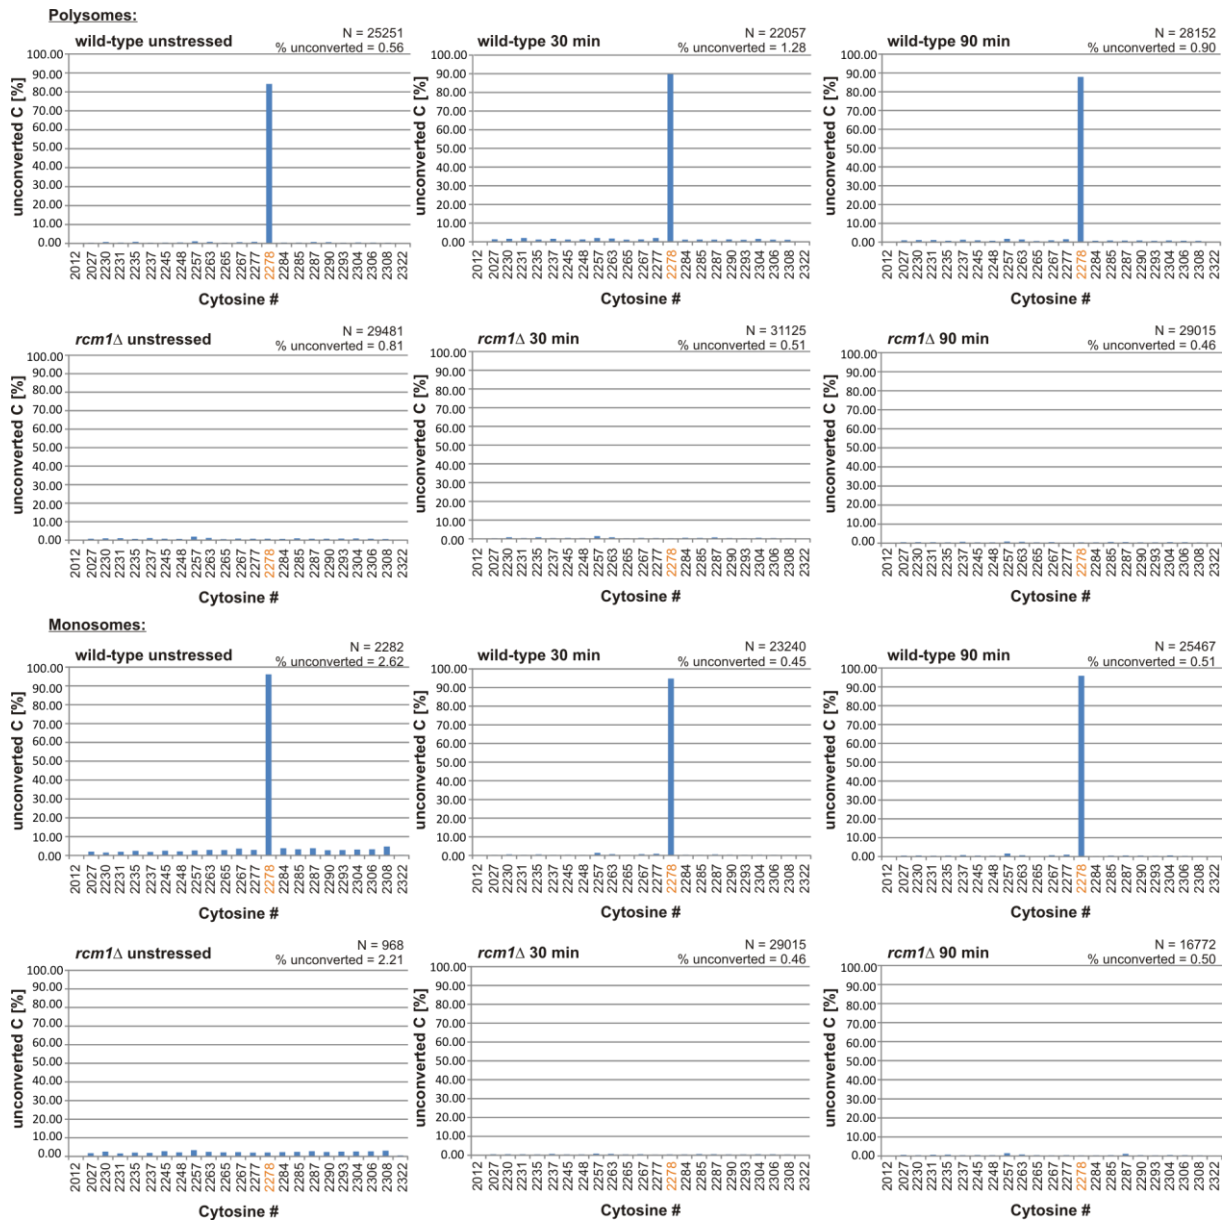

**Supplementary Figure 7 | Bisulfite treatment demonstrates Rcm1-dependent methylation of C2278 in 25S rRNA.** RNA isolated from ribosome fractions was bisulfite-sequenced. The percentage of unconverted (= C) to all (= C + T) cytosines at the indicated positions is represented by bars. C2278 is highlighted in orange. The number of full sequence reads is indicated (N), as well as the average percentage of unconverted cytosines at all positions except C2278.

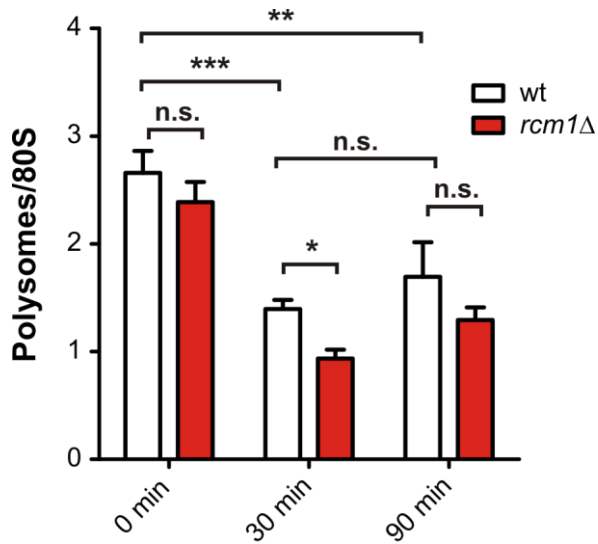

**Supplementary Figure 8 | Quantification of polysomes to monosomes ratio of wt and *rcm1* knockout cells.** The area under the curves of all recorded ribosome profiles was measured and the ratio of polysomes to monosomes was calculated. Error bars represent S.E.M. (N = 3-5,  $\alpha = 0.05$ , Two-way ANOVA with Turkey's multiple comparisons test for testing effect of stress in wt, multiple comparison two-sided t-test using the Holm-Sidak method without assuming constant S.D. for comparing wild-type and *rcm1Δ* at different timepoints, \*\*\* $p < 0.001$ , \*\* $p < 0.01$ , \* $p < 0.05$ ).



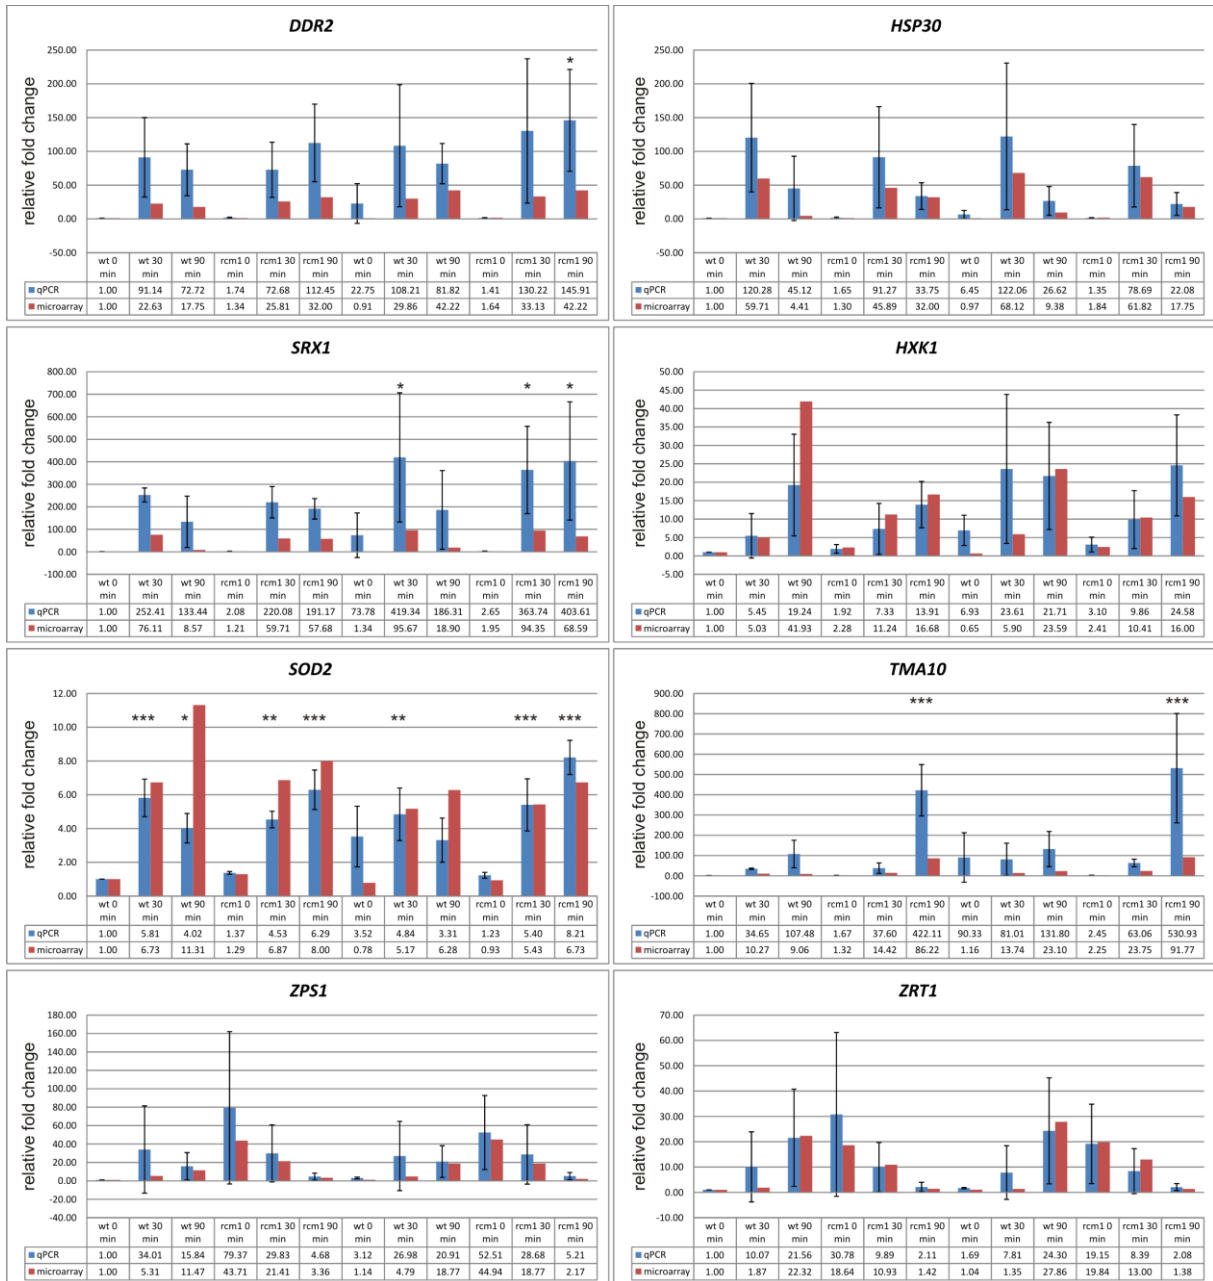

**Supplementary Figure 9 | Verification of translational profiling microarrays by RT-qPCR.** Relative expression levels of a subset of genes from the microarray (red) were validated by RT-qPCR (blue) on translatoe and transcriptome level and show similar trends. Normalization was performed against *TDH-3*, *ACT-1* and *TUB-1*. The average target gene expression relative to all three housekeeping genes is depicted. Error bar represent S.D., N = 3 biological replicates,  $\alpha = 0.05$ , one-way ANOVA with Dunnett's post test, \* $p < 0.05$ , \*\* $p < 0.005$ , \*\*\* $p < 0.001$ .

| Strain | Mean lifespan<br>+/- s.e.m. [days] | N | P | mean<br>lifespan<br>extension<br>[%] |
|--------|------------------------------------|---|---|--------------------------------------|
|--------|------------------------------------|---|---|--------------------------------------|

*dNsun5* RNAi (normal diet):

initial screen:

|                       |              |     |        |       |
|-----------------------|--------------|-----|--------|-------|
| RNAi control          | 55.9 +/- 0.8 | 147 |        |       |
| <i>dNsun5</i> RNAi 1a | 58.9 +/- 0.6 | 20  | 0.0077 | 5.37  |
| <i>dNsun5</i> RNAi 1b | 59.1 +/- 2.0 | 20  | 0.0097 | 5.72  |
| <i>dNsun5</i> RNAi 2  | 53.6 +/- 1.2 | 20  | 0.0071 | -4.11 |

replicate 1:

|                       |              |     |          |       |
|-----------------------|--------------|-----|----------|-------|
| RNAi control          | 50.8 +/- 1.2 | 168 |          |       |
| <i>dNsun5</i> RNAi 1a | 60.4 +/- 1.2 | 80  | 0.0002   | 18.90 |
| <i>dNsun5</i> RNAi 1b | 59.0 +/- 1.6 | 80  | < 0.0001 | 16.14 |
| <i>dNsun5</i> RNAi 2  | 61.4 +/- 1.3 | 82  | < 0.0001 | 20.87 |

replicate 2:

|                       |              |     |        |       |
|-----------------------|--------------|-----|--------|-------|
| RNAi control          | 56.0 +/- 0.9 | 240 |        |       |
| <i>dNsun5</i> RNAi 1a | 59.8 +/- 1.3 | 74  | 0.0015 | 6.79  |
| <i>dNsun5</i> RNAi 1b | 62.1 +/- 1.6 | 85  | 0.0010 | 10.89 |
| <i>dNsun5</i> RNAi 2  | 61.6 +/- 1.9 | 84  | 0.0002 | 10.00 |

*dNsun5* overexpression:

replicate 1 (25°C):

---

|                            |              |                  |         |        |
|----------------------------|--------------|------------------|---------|--------|
| control                    | 67.7 +/- 0.7 | 229              |         |        |
| <i>dNsun5</i> construct #1 | 28.7 +/- 2.5 | 78               | < 0,001 | -57.61 |
| <i>dNsun5</i> construct #2 |              | embryonic lethal |         |        |

**replicate 2 (20°C):**

|                            |              |                  |         |       |
|----------------------------|--------------|------------------|---------|-------|
| control                    | 67.3 +/- 0.5 | 291              |         |       |
| <i>dNsun5</i> construct #1 | 60.8 +/- 1.2 | 102              | < 0,001 | -9.66 |
| <i>dNsun5</i> construct #2 |              | embryonic lethal |         |       |

***dNsun5* RNAi (sugar and yeast rich diet):**

**replicate 1:**

|                       |              |    |         |        |
|-----------------------|--------------|----|---------|--------|
| RNAi control          | 56.8 +/- 1.2 | 85 |         |        |
| <i>dNsun5</i> RNAi 1a | 50.2 +/- 1.3 | 93 | 0.00322 | -11.62 |
| <i>dNsun5</i> RNAi 1b | 60.2 +/- 1.0 | 89 | 0.140   | 5.99   |
| <i>dNsun5</i> RNAi 2  | 61.8 +/- 0.7 | 84 | 0.128   | 8.80   |

**replicate 2:**

|                       |              |    |          |        |
|-----------------------|--------------|----|----------|--------|
| RNAi control          | 61.9 +/- 1.0 | 73 |          |        |
| <i>dNsun5</i> RNAi 1a | 50.4 +/- 1.6 | 98 | 0.000153 | -18.58 |
| <i>dNsun5</i> RNAi 1b | 61.9 +/- 1.2 | 90 | 0.318    | 0.00   |
| <i>dNsun5</i> RNAi 2  | 63.9 +/- 0.9 | 91 | 0.0728   | 3.23   |

**Supplementary Table 1 | Overview of *D. melanogaster* lifespans**

| Strain | Mean +/- s.e.m. days | Number of animals that died/total | P | mean lifespan extension [%] |
|--------|----------------------|-----------------------------------|---|-----------------------------|
|--------|----------------------|-----------------------------------|---|-----------------------------|

**NL2099 (reduced diet):**

**replicate1:**

|                    |              |         |        |       |
|--------------------|--------------|---------|--------|-------|
| RNAi control       | 15.2 +/- 0.4 | 108/120 |        |       |
| <i>nsun-5</i> RNAi | 21.0 +/- 0.7 | 88/120  | <0.001 | 38.16 |

**replicate 2:**

|                    |              |         |       |       |
|--------------------|--------------|---------|-------|-------|
| RNAi control       | 15.4 +/- 0.3 | 113/120 |       |       |
| <i>nsun-5</i> RNAi | 17.3 +/- 0.3 | 118/120 | 0.004 | 12.34 |

**replicate 3:**

|                    |              |         |        |       |
|--------------------|--------------|---------|--------|-------|
| RNAi control       | 15.2 +/- 0.3 | 116/120 |        |       |
| <i>nsun-5</i> RNAi | 17.5 +/- 0.3 | 103/120 | <0.001 | 15.13 |

**replicate 4:**

|                    |              |         |        |       |
|--------------------|--------------|---------|--------|-------|
| RNAi control       | 14.6 +/- 0.3 | 116/120 |        |       |
| <i>nsun-5</i> RNAi | 18.2 +/- 0.2 | 114/120 | <0.001 | 24.65 |

**NL2099 (ad libidum fed):**

**replicate1:**

|                    |              |         |       |      |
|--------------------|--------------|---------|-------|------|
| RNAi control       | 23.5 +/- 0.4 | 103/120 |       |      |
| <i>nsun-5</i> RNAi | 23.8 +/- 0.3 | 104/120 | 0.552 | 1.28 |

**replicate 2:**

|                    |              |        |       |       |
|--------------------|--------------|--------|-------|-------|
| RNAi control       | 31.6 +/- 0.7 | 34/120 |       |       |
| <i>nsun-5</i> RNAi | 30.7 +/- 0.6 | 53/120 | 0.513 | -2.85 |

**N2 vs. JGG1 (normal diet):**

**replicate1:**

|             |              |        |       |       |
|-------------|--------------|--------|-------|-------|
| <b>N2</b>   | 18.8 +/- 0.3 | 74/120 |       |       |
| <b>JGG1</b> | 18.1 +/- 0.3 | 96/120 | 0.144 | -3.72 |

**replicate2:**

|             |              |         |       |      |
|-------------|--------------|---------|-------|------|
| <b>N2</b>   | 17.7 +/- 0.3 | 109/120 |       |      |
| <b>JGG1</b> | 17.8 +/- 0.3 | 111/120 | 0.777 | 0.56 |

**N2 vs. JGG1 (complete removal of food):**

**replicate1:**

|             |              |       |       |       |
|-------------|--------------|-------|-------|-------|
| <b>N2</b>   | 25.9 +/- 0.9 | 40/73 |       |       |
| <b>JGG1</b> | 30.7 +/- 2.0 | 19/74 | 0.033 | 18.53 |

**replicate 2:**

|             |              |      |       |       |
|-------------|--------------|------|-------|-------|
| <b>N2</b>   | 11.2 +/- 3.0 | 6/47 |       |       |
| <b>JGG1</b> | 15.6 +/- 2.3 | 9/48 | 0.145 | 39.29 |

**DA1116 (*eat-2* mutation):**

**replicate 1:**

|                           |              |        |        |       |
|---------------------------|--------------|--------|--------|-------|
| <b>RNAi control</b>       | 23.7 +/- 0.8 | 55/120 |        |       |
| <b><i>nsun-5</i> RNAi</b> | 27.4 +/- 0.9 | 51/120 | <0.001 | 15.61 |

**replicate 2:**

|                           |              |        |        |       |
|---------------------------|--------------|--------|--------|-------|
| <b>RNAi control</b>       | 25.4 +/- 0.6 | 90/120 |        |       |
| <b><i>nsun-5</i> RNAi</b> | 28.0 +/- 0.6 | 93/120 | <0.001 | 10.24 |

**Supplementary Table 2 | Overview of *C. elegans* lifespans**

**qPCR primers:**

|                  |                        |
|------------------|------------------------|
| DDR2_qPCR_sense  | TCTGCCATCTCTGTCTTCGG   |
| DDR2_qPCR_as     | TCAAAAAGGCCAAAGCACCA   |
| HSP30_qPCR_sense | GCTAATTGCAGTCAGCCGTG   |
| HSP30_qPCR_as    | TCTGCTTCAGGTTCTGGGTTCT |
| SRX1_qPCR_sense  | CTCTAGAACAGGCTGAGGCG   |
| SRX1_qPCR_as     | CAGGTACATGCGGATTTGGC   |
| HXK1_qPCR_sense  | AATGTCTGAAGGCCACGATGT  |
| HXK1_qPCR_as     | CCGTTGACACCAGTACCGAA   |
| SOD2_qPCR_sense  | CTCCCGCAAACGCAAGAAAA   |
| SOD2_qPCR_as     | CTCGTCCAGACTGCCAAACT   |
| TMA10_qPCR_sense | TAACGGCAACTTTGGGGAGT   |
| TMA10_qPCR_as    | TGGGAGTTAGAGCCCCTTCT   |
| ZPS1_qPCR_sense  | ACCGCTGAAATCACCGCTTA   |
| ZPS1_qPCR_as     | TAGCTGCACACAAGCCATCA   |
| ZRT1_qPCR_sense  | ATGGACCCTGCTTATGGTGC   |
| ZRT1_qPCR_as     | TCGTGGGTATGGTCATGGGA   |
| ACT1_qPCR_sense  | TGAGAATCGATTTGGCCGGT   |
| ACT1_qPCR_as     | GATTGAGCAGCGTTTGCAT    |
| TDH3_qPCR_sense  | TGCCATGGGGTTCTTCCAACG  |
| TDH3_qPCR_as     | TGGGGCGGTGGAAGATGGAG   |
| TUB1_qPCR_sense  | ACTGGTTCCGGTCTAGGGTC   |
| TUB1_qPCR_as     | TGCAAAGCTTGGTCTTGGGA   |

**Bisulfite Sequencing primers:**

|                             |                        |
|-----------------------------|------------------------|
| SC-25S-rRNA_bisulfite_sense | TGGTTAGAAAGTGATGTT     |
| SC-25S-rRNA_bisulfite_as    | TCTCATTAAATCCATTCA     |
| CE-28S-rRNA_bisulfite_sense | TGAATGTTAAATTGTAGTAATT |
| CE-28S-rRNA_bisulfite_as    | TCTCGTTAAATCCATTCA     |

**Barcode primers:**

|                            |                                                            |
|----------------------------|------------------------------------------------------------|
| SC-25S-rRNA_torrent_code1f | CCATCTCATCCCTGCGTGTCTCCGACTCAGACGAGTGCCTTTTGAATGTTAAAGTGAA |
| SC-25S-rRNA_torrent_code1r | CCTCTCTATGGGCAGTCGGTGATACGAGTGCCTTCTCATTAAATCCATTCA        |
| SC-25S-rRNA_torrent_code2f | CCATCTCATCCCTGCGTGTCTCCGACTCAGACGCTCGACATTTGAATGTTAAAGTGAA |
| SC-25S-rRNA_torrent_code2r | CCTCTCTATGGGCAGTCGGTGATACGCTCGACATCTCATTAAATCCATTCA        |
| SC-25S-rRNA_torrent_code3f | CCATCTCATCCCTGCGTGTCTCCGACTCAGAGACGCACTCTTTGAATGTTAAAGTGAA |
| SC-25S-rRNA_torrent_code3r | CCTCTCTATGGGCAGTCGGTGATAGACGCACTCTCTCATTAAATCCATTCA        |
| SC-25S-rRNA_torrent_code4f | CCATCTCATCCCTGCGTGTCTCCGACTCAGAGCACTGTAGTTTGAATGTTAAAGTGAA |

|                             |                                                                 |
|-----------------------------|-----------------------------------------------------------------|
| SC-25S-rRNA_torrent_code4r  | CCTCTCTATGGGCAGTCGGTGATAGCACTGTAGTCTCATTAAATCCATTCA             |
| SC-25S-rRNA_torrent_code5f  | CCATCTCATCCCTGCGTGTCTCCGACTCAGATCAGACACGTTTGAATGTTAAAGTGAA      |
| SC-25S-rRNA_torrent_code5r  | CCTCTCTATGGGCAGTCGGTGATATCAGACACGTCTCATTAAATCCATTCA             |
| SC-25S-rRNA_torrent_code6f  | CCATCTCATCCCTGCGTGTCTCCGACTCAGATATCGCGAGTTTGAATGTTAAAGTGAA      |
| SC-25S-rRNA_torrent_code6r  | CCTCTCTATGGGCAGTCGGTGATATATCGCGAGTCTCATTAAATCCATTCA             |
| SC-25S-rRNA_torrent_code7f  | CCATCTCATCCCTGCGTGTCTCCGACTCAGCGTGTCTCTATTTGAATGTTAAAGTGAA      |
| SC-25S-rRNA_torrent_code7r  | CCTCTCTATGGGCAGTCGGTGATCGTGTCTCTATCTCATTAAATCCATTCA             |
| SC-25S-rRNA_torrent_code8f  | CCATCTCATCCCTGCGTGTCTCCGACTCAGCTCGCGTGTCTTTGAATGTTAAAGTGAA      |
| SC-25S-rRNA_torrent_code8r  | CCTCTCTATGGGCAGTCGGTGATCTCGCGTGTCTCTCATTAAATCCATTCA             |
| SC-25S-rRNA_torrent_code9f  | CCATCTCATCCCTGCGTGTCTCCGACTCAGTCTCTATGCGTTTGAATGTTAAAGTGAA      |
| SC-25S-rRNA_torrent_code9r  | CCTCTCTATGGGCAGTCGGTGATTCTCTATGCGTCTCATTAAATCCATTCA             |
| SC-25S-rRNA_torrent_code10f | CCATCTCATCCCTGCGTGTCTCCGACTCAGTGATACGTCTTTTGAATGTTAAAGTGAA      |
| SC-25S-rRNA_torrent_code10r | CCTCTCTATGGGCAGTCGGTGATTGATACGTCTTCTCATTAAATCCATTCA             |
| SC-25S-rRNA_torrent_code11f | CCATCTCATCCCTGCGTGTCTCCGACTCAGATAGTAGTGTGTTGAATGTTAAAGTGAA      |
| SC-25S-rRNA_torrent_code11r | CCTCTCTATGGGCAGTCGGTGATATAGTAGTGTCTCATTAAATCCATTCA              |
| SC-25S-rRNA_torrent_code12f | CCATCTCATCCCTGCGTGTCTCCGACTCAGCGAGAGATATTTGAATGTTAAAGTGAA       |
| SC-25S-rRNA_torrent_code12r | CCTCTCTATGGGCAGTCGGTGATCGAGAGATATCTCATTAAATCCATTCA              |
| SC-25S-rRNA_torrent_code13f | CCATCTCATCCCTGCGTGTCTCCGACTCAGATACGACGTATTTGAATGTTAAAGTGAA      |
| SC-25S-rRNA_torrent_code14f | CCATCTCATCCCTGCGTGTCTCCGACTCAGTCACGTACTATTTGAATGTTAAAGTGAA      |
| SC-25S-rRNA_torrent_code15f | CCATCTCATCCCTGCGTGTCTCCGACTCAGCGTCTAGTACTTTGAATGTTAAAGTGAA      |
| SC-25S-rRNA_torrent_code16f | CCATCTCATCCCTGCGTGTCTCCGACTCAGTCTACGTAGCTTTGAATGTTAAAGTGAA      |
| SC-25S-rRNA_torrent_code17f | CCATCTCATCCCTGCGTGTCTCCGACTCAGTGTACTACTTTTGAATGTTAAAGTGAA       |
| SC-25S-rRNA_torrent_code18f | CCATCTCATCCCTGCGTGTCTCCGACTCAGACGACTACAGTTTGAATGTTAAAGTGAA      |
| SC-25S-rRNA_torrent_code19f | CCATCTCATCCCTGCGTGTCTCCGACTCAGCGTAGACTAGTTTGAATGTTAAAGTGAA      |
| SC-25S-rRNA_torrent_code20f | CCATCTCATCCCTGCGTGTCTCCGACTCAGTACGAGTATGTTTGAATGTTAAAGTGAA      |
| SC-25S-rRNA_torrent_code21f | CCATCTCATCCCTGCGTGTCTCCGACTCAGTACTCTCGTGTGTTGAATGTTAAAGTGAA     |
| SC-25S-rRNA_torrent_code22f | CCATCTCATCCCTGCGTGTCTCCGACTCAGTAGAGACGAGTTTGAATGTTAAAGTGAA      |
| SC-25S-rRNA_torrent_code23f | CCATCTCATCCCTGCGTGTCTCCGACTCAGTCGTCGCTCGTTTGAATGTTAAAGTGAA      |
| SC-25S-rRNA_torrent_code24f | CCATCTCATCCCTGCGTGTCTCCGACTCAGACATACGCGTTTGAATGTTAAAGTGAA       |
| SC-25S-rRNA_torrent_code13r | CCTCTCTATGGGCAGTCGGTGATATACGACGTATCTCATTAAATCCATTCA             |
| SC-25S-rRNA_torrent_code14r | CCTCTCTATGGGCAGTCGGTGATTCACGTACTATCTCATTAAATCCATTCA             |
| SC-25S-rRNA_torrent_code15r | CCTCTCTATGGGCAGTCGGTGATCGTCTAGTACTCTCATTAAATCCATTCA             |
| SC-25S-rRNA_torrent_code16r | CCTCTCTATGGGCAGTCGGTGATTCTACGTAGCTCTCATTAAATCCATTCA             |
| SC-25S-rRNA_torrent_code17r | CCTCTCTATGGGCAGTCGGTGATTGTACTACTTCTCATTAAATCCATTCA              |
| SC-25S-rRNA_torrent_code18r | CCTCTCTATGGGCAGTCGGTGATACGACTACAGTCTCATTAAATCCATTCA             |
| SC-25S-rRNA_torrent_code19r | CCTCTCTATGGGCAGTCGGTGATCGTAGACTAGTCTCATTAAATCCATTCA             |
| SC-25S-rRNA_torrent_code20r | CCTCTCTATGGGCAGTCGGTGATTACGAGTATGTCTCATTAAATCCATTCA             |
| SC-25S-rRNA_torrent_code21r | CCTCTCTATGGGCAGTCGGTGATTACTCTCGTGTCTCATTAAATCCATTCA             |
| SC-25S-rRNA_torrent_code22r | CCTCTCTATGGGCAGTCGGTGATTAGAGACGAGTCTCATTAAATCCATTCA             |
| SC-25S-rRNA_torrent_code23r | CCTCTCTATGGGCAGTCGGTGATTCTGTCGCTCGTCTCATTAAATCCATTCA            |
| SC-25S-rRNA_torrent_code24r | CCTCTCTATGGGCAGTCGGTGATACGAGTGC GTTCTCATTAAATCCATTCA            |
| CE-28S-rRNA_torrent_code1f  | CCATCTCATCCCTGCGTGTCTCCGACTCAGACGAGTGC GTTGAATGTTAAATTGTAGTAATT |
| CE-28S-rRNA_torrent_code2f  | CCATCTCATCCCTGCGTGTCTCCGACTCAGACGCTCGACATGAATGTTAAATTGTAGTAATT  |
| CE-28S-rRNA_torrent_code3f  | CCATCTCATCCCTGCGTGTCTCCGACTCAGAGACGCACTCTGAATGTTAAATTGTAGTAATT  |
| CE-28S-rRNA_torrent_code4f  | CCATCTCATCCCTGCGTGTCTCCGACTCAGAGCACTGTAGTGAATGTTAAATTGTAGTAATT  |

|                            |                                                                |
|----------------------------|----------------------------------------------------------------|
| CE-28S-rRNA_torrent_code5f | CCATCTCATCCCTGCGTGTCTCCGACTCAGATCAGACACGTGAATGTTAAATTGTAGTAATT |
| CE-28S-rRNA_torrent_code6f | CCATCTCATCCCTGCGTGTCTCCGACTCAGATATCGCGAGTGAATGTTAAATTGTAGTAATT |
| CE-28S-rRNA_torrent_code7f | CCATCTCATCCCTGCGTGTCTCCGACTCAGCGTGTCTCTATGAATGTTAAATTGTAGTAATT |
| CE-28S-rRNA_torrent_code1r | CCTCTCTATGGGCAGTCGGTGATACGAGTGC GTTCTCGTTAATCCATTCA            |
| CE-28S-rRNA_torrent_code2r | CCTCTCTATGGGCAGTCGGTGATACGCTCGACATCTCGTTAATCCATTCA             |
| CE-28S-rRNA_torrent_code3r | CCTCTCTATGGGCAGTCGGTGATAGACGCACTCTCTCGTTAATCCATTCA             |
| CE-28S-rRNA_torrent_code4r | CCTCTCTATGGGCAGTCGGTGATAGCACTGTAGTCTCGTTAATCCATTCA             |
| CE-28S-rRNA_torrent_code5r | CCTCTCTATGGGCAGTCGGTGATATCAGACACGTCTCGTTAATCCATTCA             |
| CE-28S-rRNA_torrent_code6r | CCTCTCTATGGGCAGTCGGTGATATATCGCGAGTCTCGTTAATCCATTCA             |
| CE-28S-rRNA_torrent_code7r | CCTCTCTATGGGCAGTCGGTGATCGTGTCTCTATCTCGTTAATCCATTCA             |

**Supplementary Table 3 | Primers used in this study**
